# Supplementary material for: Embracing the Nutritional Assessment in Cerebral Palsy: A Toolkit for Healthcare Professionals for Daily Practice
Source: MDPI journal article supplement (doi:10.3390/nu14061180), 2022-03-11
Supplement: s1 [file s1]

# TOOLKIT

## WEIGHT AND HEIGHT ASSESSMENT IN CHILDREN WITH CEREBRAL PALSY

FINANCIAL SUPPORT: IPL /2020 / PIN-PC\_ESTESL

2022

# WEIGHT AND HEIGHT ASSESSMENT IN CHILDREN WITH CEREBRAL PALSY

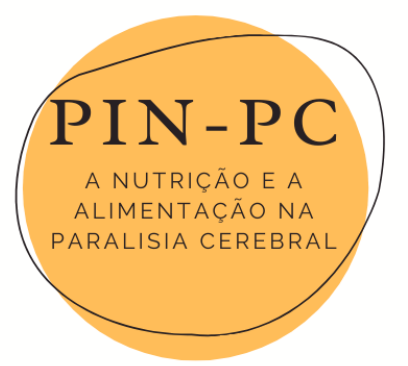

MALNUTRITION IN  
CHILDREN WITH  
CEREBRAL PALSY

## THE IMPORTANCE TO ASSESS

Why?

- nutritional deficits;
- lack of physical activity;
- endocrine dysfunctions.

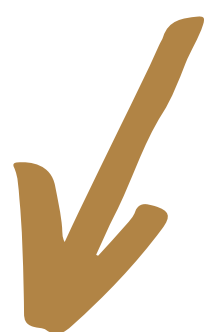

**By deficit | Undernutrition**

Cannot acquire necessary nutrients  
(e.g. eating difficulties)

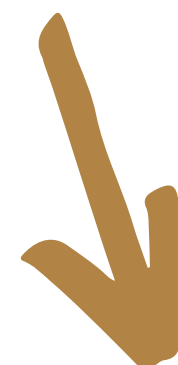

**By excess | Obesity**

Difficulty in adapting physical  
activity to the degree of motor  
impairment; injuries and fractures.

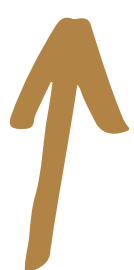

Problems with  
oromotor function

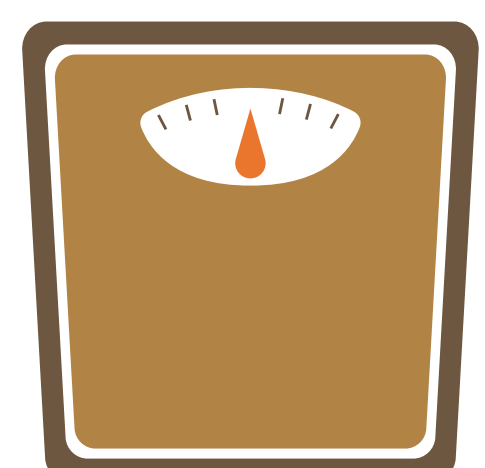

# WEIGHT AND HEIGHT ASSESSMENT IN CHILDREN WITH CEREBRAL PALSY



MORE DIFFICULT WHEN  
THERE ARE CONTRACTURES,  
MOVEMENT DISORDERS OR  
MUSCULAR ATROPHY

## SOMATOMETRIC DATA EVALUATION

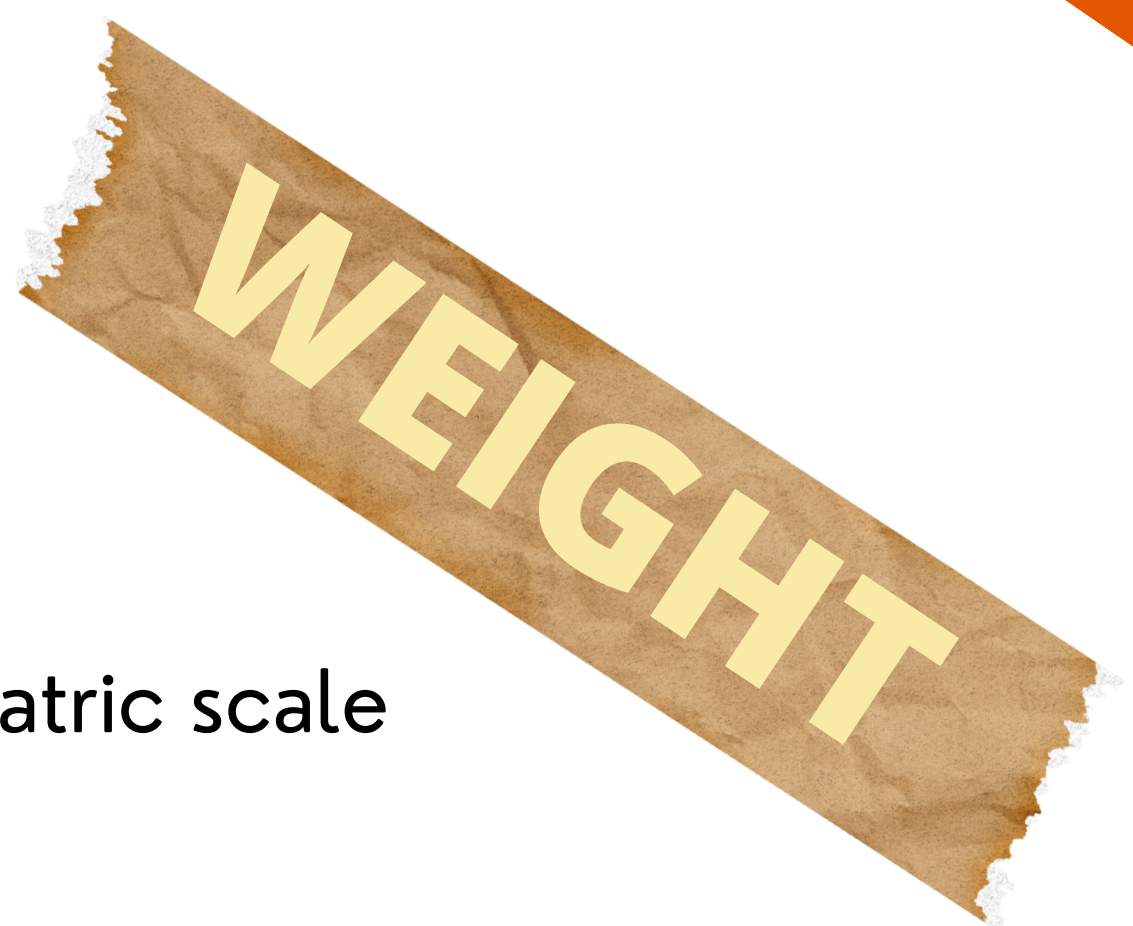

Children under 2 years of age: pediatric scale

### Can remain standing and still during weighing

1. Check that the zero value is visible on the display when the scale is turned on;
2. Ask the child to be in light underclothes or the caregiver to undress him/her; If on diaper, ask to change to a dry one (and tare the diaper);
3. Record the value as quickly as possible to prevent the child from cooling down.
4. If the child has corrective prosthetics, subtract.

# WEIGHT AND HEIGHT ASSESSMENT IN CHILDREN WITH CEREBRAL PALSY



MORE DIFFICULT WHEN THERE ARE CONTRACTURES, MOVEMENT DISORDERS OR MUSCULAR ATROPHY

## SOMATOMETRIC DATA EVALUATION

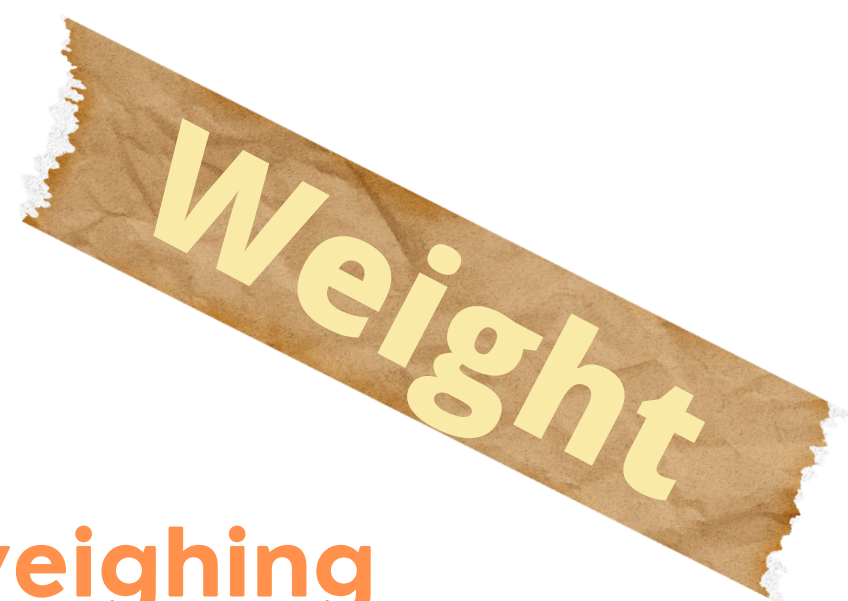

Unable to stand still during weighing

Wheelchair-adapted scales are available

or

Wheelchair-adapted scales are not available

1. Check that the zero value is visible on the display when the scale is turned on;
2. Weigh the wheelchair without the child being seated;
3. Tare the scale with the wheelchair before placing the child in a sitting position;
4. Ask the child to be in light underclothes or the caregiver to undress him/her. If on diaper, ask to change to a dry one (and tare the diaper with the wheelchair);
5. Put the child in the wheelchair and record the value as quickly as possible to prevent the child from cooling down.
6. The weight of the wheelchair should be recorded for ease of procedure.

1. Use a trade scale;
2. Check that the zero value is visible on the display when the scale is turned on;
3. Ask the child to be in light underclothes or the caregiver to undress him/her
4. Ask the caregiver to remain still on the scale and tare the scale until the zero value reappears;
5. Place the child on the caregiver's lap so that the caregiver can hold him/her;
6. Record the weight of the child that appears on the display.

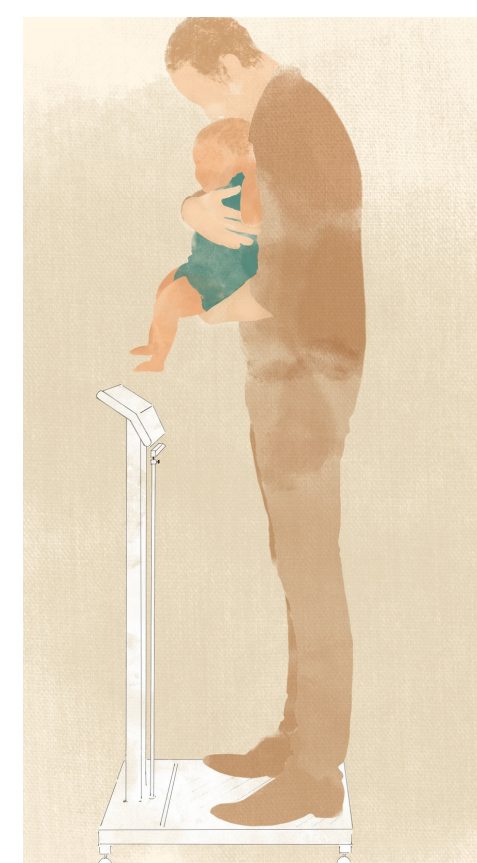



# WEIGHT AND HEIGHT ASSESSMENT IN CHILDREN WITH CEREBRAL PALSY



MORE DIFFICULT WHEN  
THERE ARE CONTRACTURES,  
MOVEMENT DISORDERS OR  
MUSCULAR ATROPHY

## SOMATOMETRIC DATA EVALUATION

Weight

Measure MUAC and apply Brunner's Equation

Measure mid-upper arm circumference

1. Select the less affected arm and undress it;
2. Bend the arm at 90° angle at the elbow, with the palm facing up and stretched out as much as possible;
3. Find acromion and olecranium and mark the midpoint with an anthropometric tape;
4. Measure arm circumference at marked point;

| When              | Equation to predict weight                                                   |
|-------------------|------------------------------------------------------------------------------|
| GMFCS level I–III | $2,52 \times \text{MUAC}(\text{cm}) + 1,19 \times \text{age (years)} - 32$   |
| GMFCS level IV–V  | $2,02 \times \text{MUAC}(\text{cm}) + 0,97 \times \text{age (years)} - 22,5$ |

# WEIGHT AND HEIGHT ASSESSMENT IN CHILDREN WITH CEREBRAL PALSY



SUPINE  
STAND UP

## SOMATOMETRIC DATA EVALUATION

HEIGHT

Without scoliosis, kyphosis or structural deformities in the flexion of the lower limbs

Stand up

Use a stadiometer

1. The assembled stadiometer must rest on a flat surface with maximum stability;
2. Ask the child and/or caregiver to take off their shoes and remove accessories that make the assessment difficult: hat, cap, bow.
3. Keep the child in an upright position, motionless, with arms extended along the body with the palms of the hands facing inwards;
4. Place the child's head in the Frankfurt horizontal plane and eyes looking to the ceiling
5. Place the child's heels and knees together and toes 60° apart;
6. Place the heels, the calf region, the pelvic girdle, the shoulder girdle and the occipital region in contact with the wall or the metal of the stadiometer in order to maintain balance;
7. Ask the child to inhale and hold the position;
8. Take the measurement with the stadiometer caliper at a 90° angle to the scale, moving it slowly until it compresses the hair and touches the highest point of the skull (vertex);

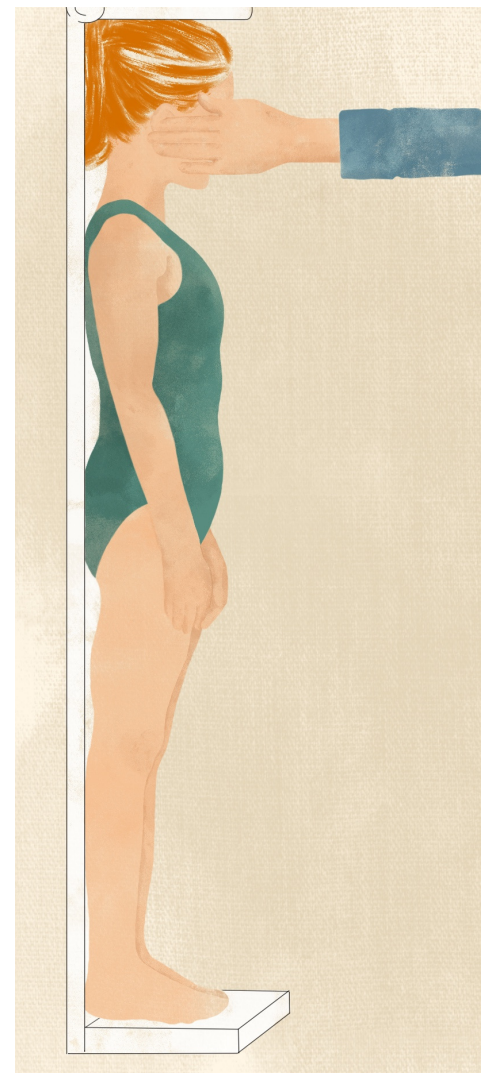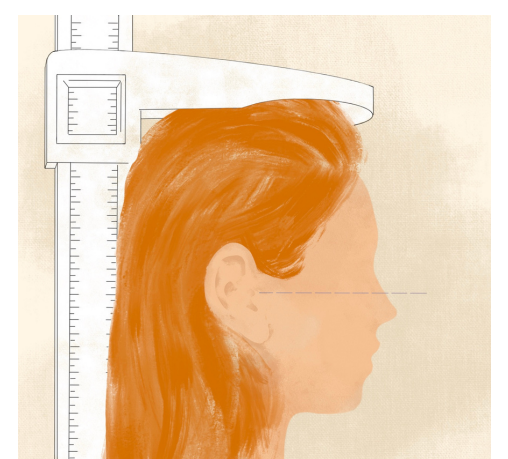



# WEIGHT AND HEIGHT ASSESSMENT IN CHILDREN WITH CEREBRAL PALSY



## SUPINE STAND UP SOMATOMETRIC DATA EVALUATION

HEIGHT

**Without scoliosis, kyphosis or structural deformities in the flexion of the lower limbs**

Supine

Use a caliper

1. Place the caliper on a smooth, not too soft and comfortable surface;
2. Cover the surface with a thin cloth or soft paper for hygiene and comfort of the child;
3. Lay the child in the supine position, with the head against the fixed plate, compressing the hair;
4. Ask the caregiver to stand behind the child to hold the child's head in position
5. Assure that the child remains in position so that the shoulder touches the caliper;
6. Hold the legs with one hand and apply light pressure to the knees to straighten them as much as possible without hurting them, while the other hand moves the movable plate against the soles of the child's feet. If it is not possible to keep both legs straight, measure only one and move the moving plate to the sole of the heel.

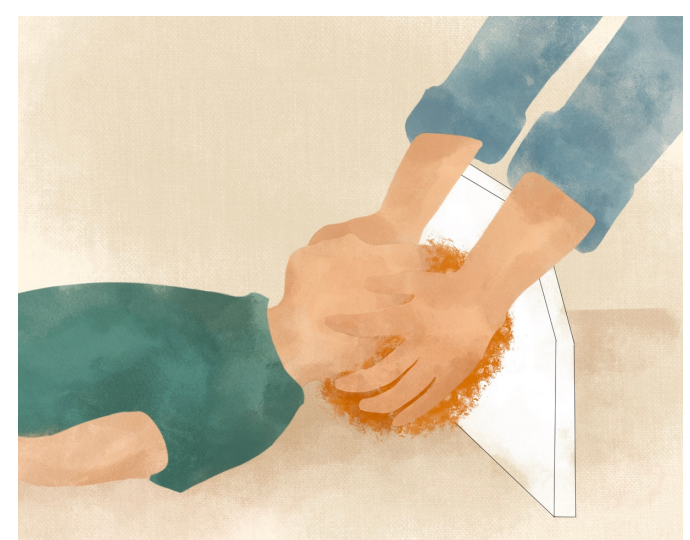

# WEIGHT AND HEIGHT ASSESSMENT IN CHILDREN WITH CEREBRAL PALSY



## SUPINE STAND UP SOMATOMETRIC DATA EVALUATION

Height

With scoliosis, kyphosis or structural deformities in the flexion of the lower limbs

**Alternative measures** based on **body segment** measurement

**Knee height**  
**Length of the tibia**  
Arm length  
Length of the ulna

ESPGHAN recommends measuring these segments and applying the values to the **Stevenson Equation**

### Knee height

1. Place the child in a sitting position, naked from the knee down with barefoot;
2. Bend the left knee (or less involved side) and ankle in a 90° angle;
3. Use the caliper placing the fixed part positioned on the plantar surface of the foot (heel) and press the mobile part over the head of the patella (kneecap). The tape can be used instead of the caliper.
4. Apply the value obtained in the equation for this body segment.

### Length of the tibia

1. Place the child in a sitting position, naked from the knee down, to expose measurement area;
2. Use an anthropometric tape to measure the length between the superomedial edge of the tibia and the lower edge of the malleolus;
3. Apply the value obtained in the equation for this body segment.

#### Segmental measures

#### Equation to predict height

Knee height (KH)  
Tibia length (TL)

$(2.69 \times KH) + 24.2$   
 $(3.26 \times TL) + 30.8$



# WEIGHT AND HEIGHT ASSESSMENT IN CHILDREN WITH CEREBRAL PALSY



## SUPINE STAND UP SOMATOMETRIC DATA EVALUATION

Height

With scoliosis, kyphosis or structural deformities in the flexion of the lower limbs

**Alternative mesures** based on **body segment** measurement

Knee height  
Length of the tibia  
Arm length  
Length of the ulna

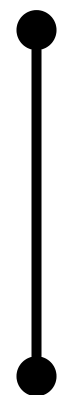

Knee height

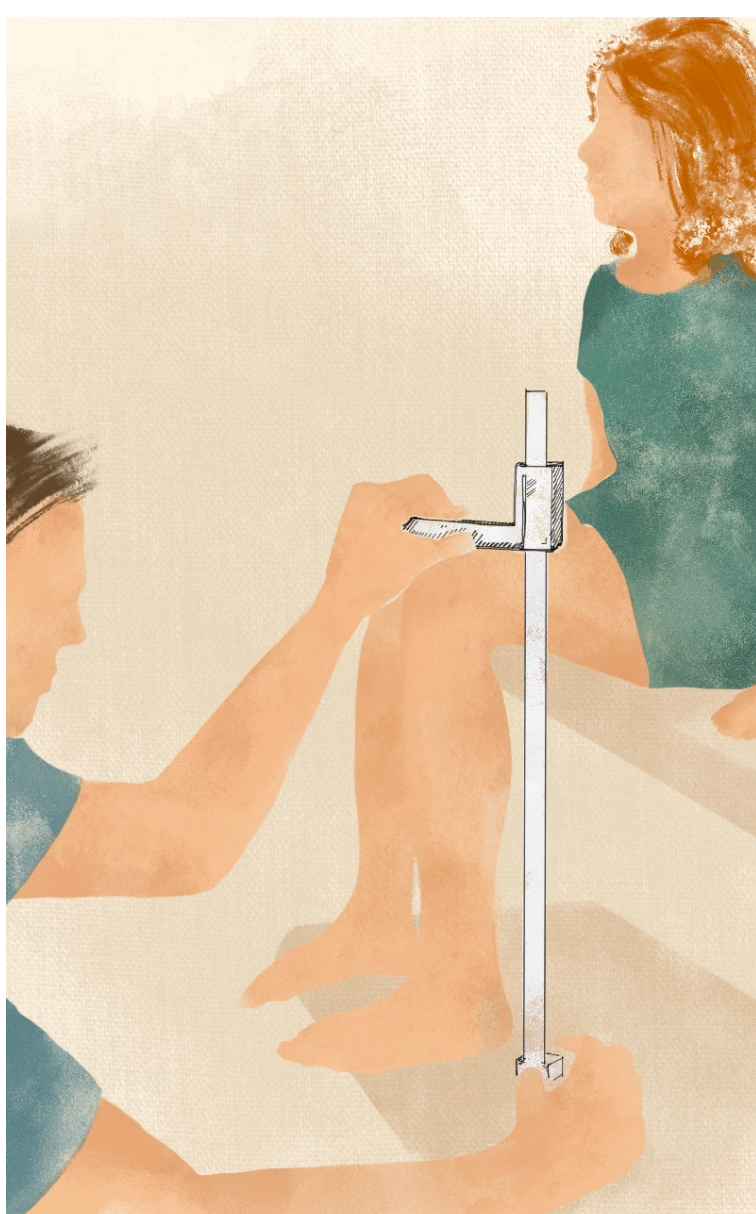

Length of the tibia

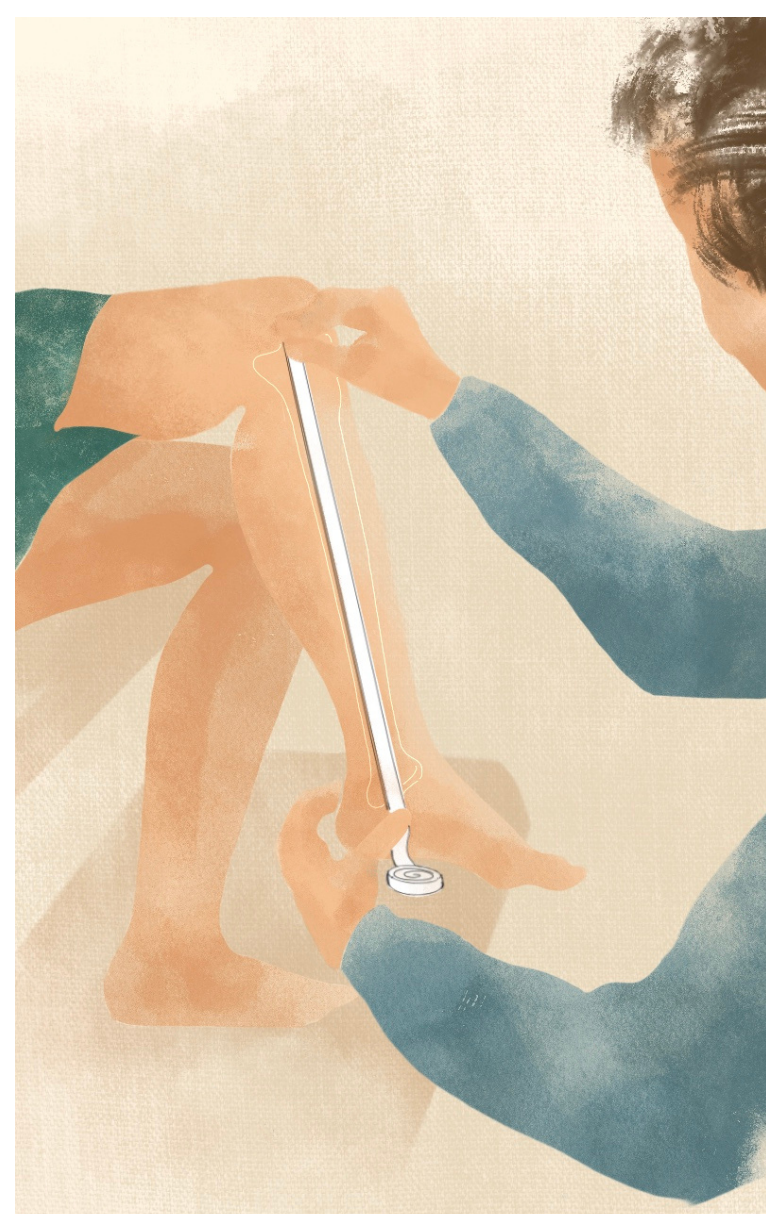



# WEIGHT AND HEIGHT ASSESSMENT IN CHILDREN WITH CEREBRAL PALSY

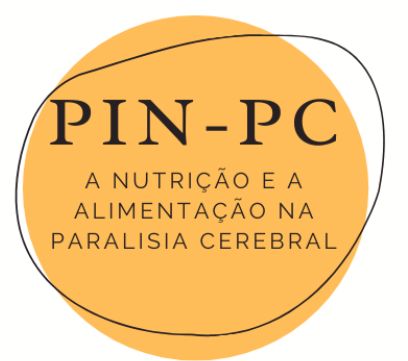

## SUPINE STAND UP SOMATOMETRIC DATA EVALUATION

Height

With scoliosis, kyphosis or structural deformities in the flexion of the lower limbs

**Alternative measures** based on **body segment** measurement

Arm length ----- Apply **Stevenson Equation**

Length of the ulna ----- Apply **Gauld Equation**

Arm lenght

1. Place the child in an upright position, being able to be sitting or standing;
2. Position the child's arm in a relaxed manner, with the elbow at a 90° angle;
3. Use an anthropometric tape to measure acromion to radial head length;
4. Apply the value obtained in the equation for this body segment

Ulna lenght

1. Place the child in a sitting position with forearm resting on a table and the palm of the hand pointing downwards and the fingers straight. The elbow must be bent between 90° and 100°;
2. Palpate the ulna until it finds its proximal end and, in opposition, find the tip of the styloid process by palpating the bone distally until finding its end;
3. Use the anthropometric tape or an anthropometer to measure the distance between the two points found;
4. Apply the value obtained in the equation for this body segment

Segmental mesures

Equation to predict height

Arm lenght (AL)  
Ulna length (UL) - boys  
Ulna length (UL) - girls

$(4.35 \times AL) + 21.8$   
 $(4.605 \times UL) + (1.308 \times A) + 28.003$   
 $(4.459 \times UL) + (1.315 \times A) + 31.485$



# WEIGHT AND HEIGHT ASSESSMENT IN CHILDREN WITH CEREBRAL PALSY



## SUPINE STAND UP SOMATOMETRIC DATA EVALUATION

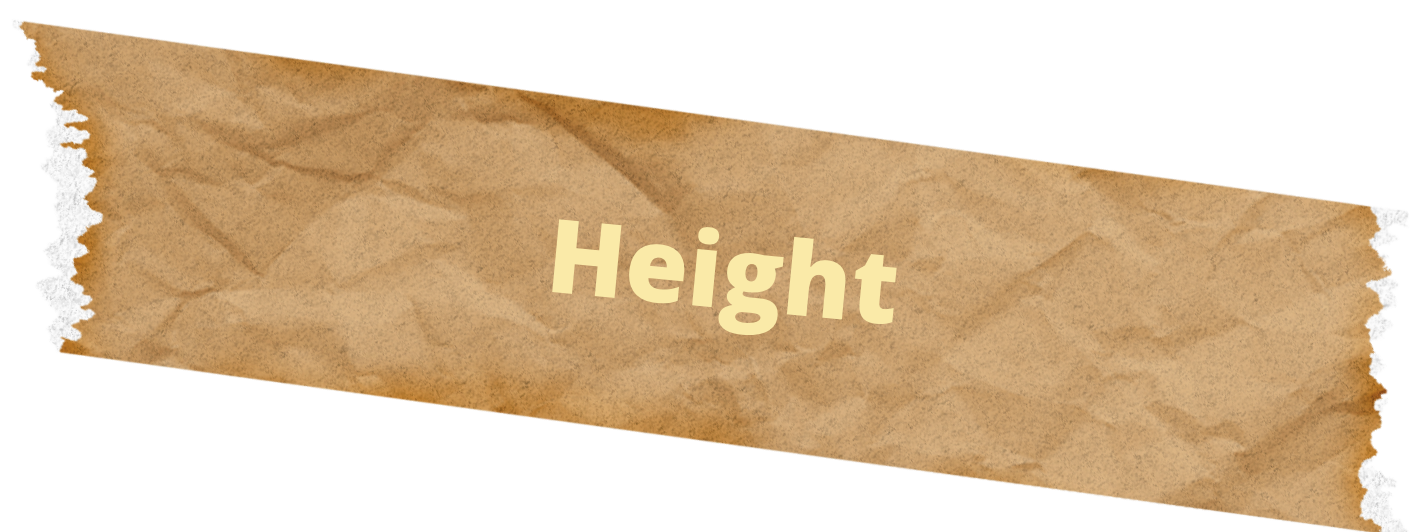

With scoliosis, kyphosis or structural deformities in the flexion of the lower limbs

**Alternative measures** based on **body segment** measurement

Arm length

Length of the ulna

Arm length

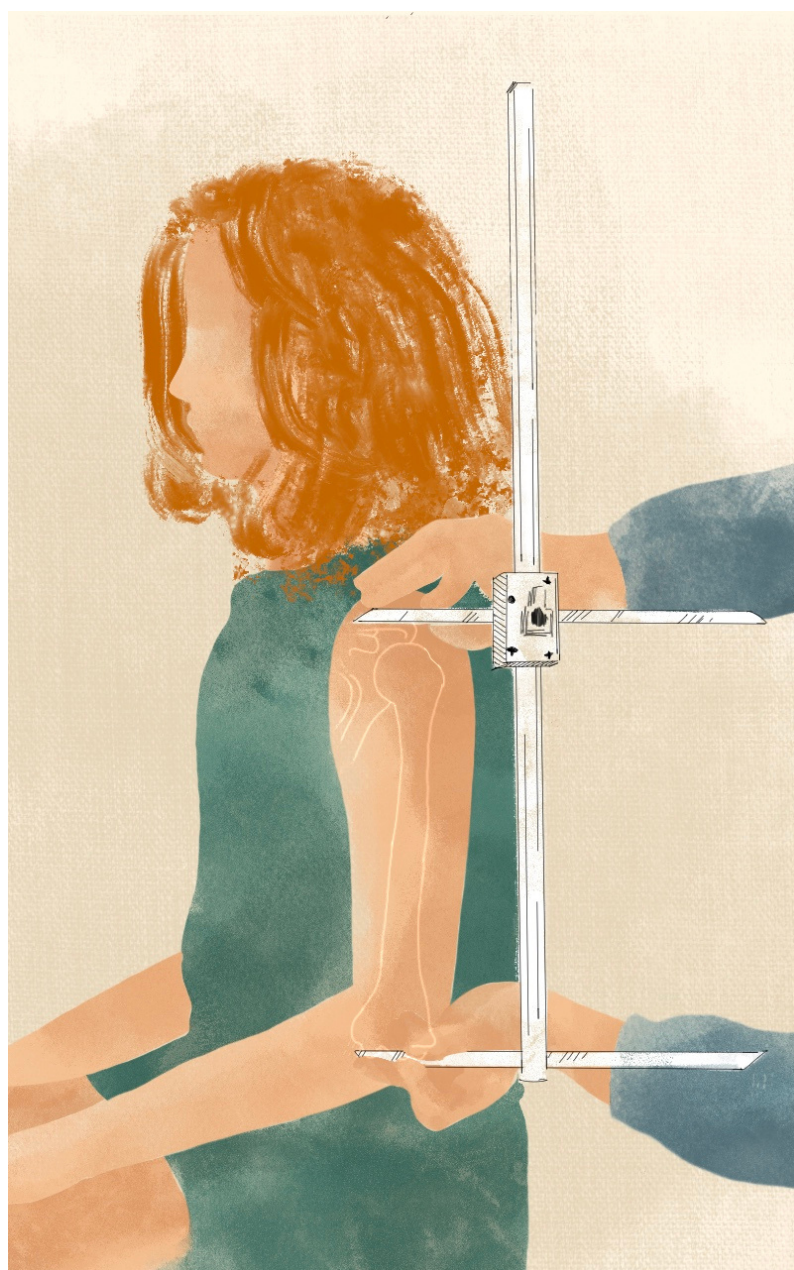

Ulna length

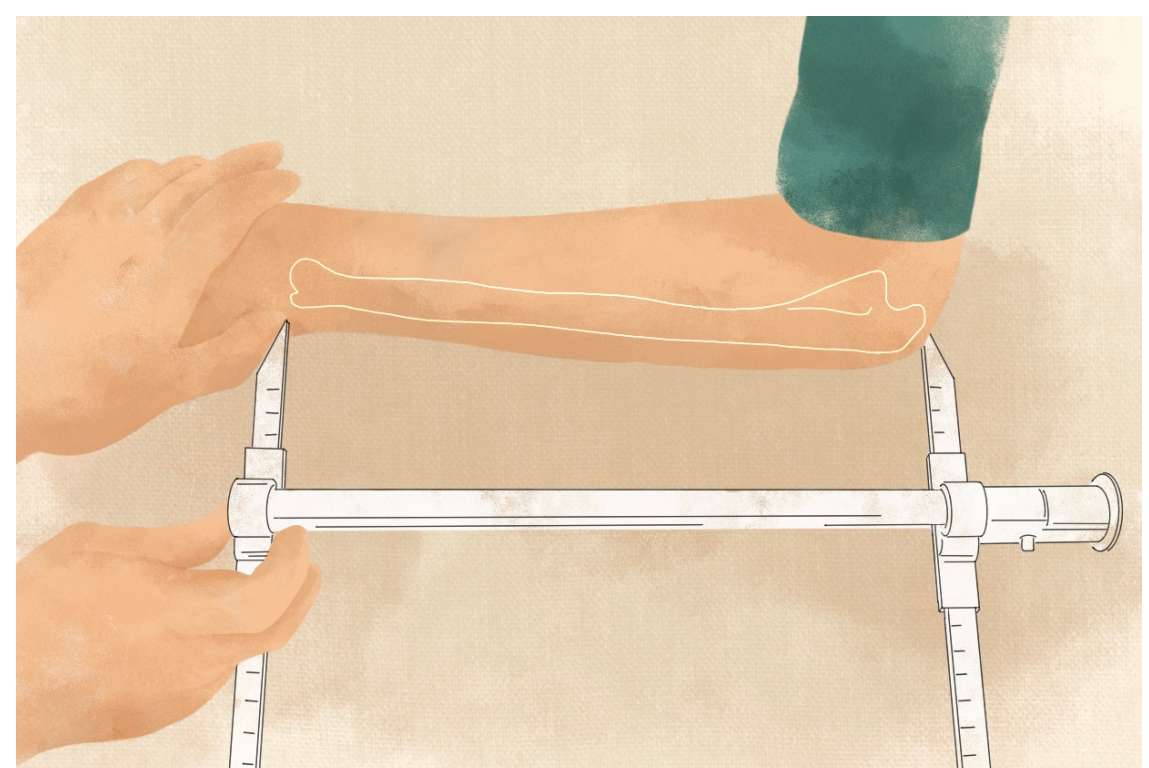



# WEIGHT AND HEIGHT ASSESSMENT IN CHILDREN WITH CEREBRAL PALSY



## NUTRITIONAL REGISTRATION PROCESS

NAME \_\_\_\_\_

GENDER Female\_\_ Male\_\_

BIRTH \_\_\_\_ / \_\_\_\_ / \_\_\_\_

AGE  years

### WEIGHT

Weight (children) \_\_\_\_,\_\_ Kg

Weight (children) + wheelchair + prostheses \_\_\_\_,\_\_ Kg

Weight (wheelchair) \_\_\_\_,\_\_ Kg

Weight (prostheses) \_\_\_\_,\_\_ Kg

Weight (children)  Kg

### HEIGHT

Height (children) \_\_\_\_ cm

Knee Height \_\_\_\_ cm

Height (children)  cm

Tibia length \_\_\_\_ cm

Height (children)  cm

Arm length \_\_\_\_ cm

Height (children)  cm

Ulna length \_\_\_\_ cm

Height (children)  cm
